# Supplementary material for: Reverse Ordered Sequential Mechanism for Lactoperoxidase with Inhibition by Hydrogen Peroxide
Source: MDPI journal article supplement (doi:10.3390/antiox10111646), 2021-10-20
Supplement: s1 [file s1]

# Reverse Ordered Sequential Mechanism for Lactoperoxidase with Inhibition by Hydrogen Peroxide

Kellye Cupp-Sutton and Michael T. Ashby\*

Department of Chemistry and Biochemistry, University of Oklahoma, Norman, OK 73019

## SUPPORTING MATERIALS

**A Discussion of Related Literature for MPO.** A Compound II-like species has been previously observed for MPO under conditions of low  $[\text{SCN}^-]$  (Schlorke, D.; Flemmig, J.; Gau, J.; Furtmüller, P. G.; Obinger, C.; Arnhold, J., “New Insights into thiocyanate oxidation by human myeloperoxidase,” *J. Inorg. Biochem.*, **2016**, *162*, 117-126). The authors of the 2016 study offer a mechanism for MPO that is very different than the one that is described for LPO in the present work. However, there are several reasons a discussion of the 2016 study is problematic, including:

- The focus of the 2016 paper was on identifying transient MPO species. The work did not produce a rate law that explains their observations. Furthermore, no correlate was made between the observed MPO species and catalysis.
- Formation of Compound II-like species were observed in the presence of a 20,000-fold excess of  $\text{OSCN}^-$  under conditions that are known to produce large amounts of reactive impurities (including cyanide, sulfite, cyanate, and cyanosulfite). Thus, it is impossible to attribute the reaction to  $\text{OSCN}^-$ .
- The products formed from the oxidation of  $\text{SCN}^-$  were characterized using  $^{13}\text{C}$  NMR. This is not a quantitative method. In fact, the relaxation times for sp-hybridized  $^{13}\text{C}$  are so long, it is impossible to observe complete relaxation of all of the unstable  $\text{SCN}^-$ -derived species during their lifetime.
- SVD analysis (cf. Figure 5) was not performed on the time-resolved spectral data. Thus, not only are the number of colored species unknown, but the values of  $\lambda_{\text{max}}$  are suspect.
- The 2016 study begins with the pre-formation of MPO Compound I, which we argue for LPO is never formed in significant concentrations. Furthermore, MPO Compound I was prepared using excess  $\text{HOCl}$  without consideration of the near diffusion-controlled reaction of  $\text{HOCl}$  with  $\text{SCN}^-$  and  $\text{OSCN}^-$  in subsequent mixing cycles.
- We have previously shown (e.g., ref. 30) that the conditions that the authors employed in their 2016 paper to produce  $\text{OSCN}^-$  under conditions of low  $[\text{SCN}^-]$  results in over-oxidation of  $\text{SCN}^-$  and the production of  $\text{SCN}^-$  species (including  $\text{CN}^-$ ) that are not typically formed during catalysis. E.g., it is not possible to prepare 17 mM  $\text{OSCN}^-$  by reacting  $\text{HOCl}$  with  $\text{SCN}^-$  without the production of large amounts of side products (cf. Figure 6 of the 2016 paper).

- In the 2016 paper, the rate of formation of MPO Compound II by the reaction of OSCN<sup>-</sup> with ferric MPO is reported to be  $6 \times 10^4 \text{ M}^{-1}\text{s}^{-1}$ . First, we do not believe this is actually the reaction of OSCN<sup>-</sup> with MPO, but rather the reaction of over-oxidation products. Also, we do not know what the corresponding rate constant would be for LPO. However, even if we assume the reaction is diffusion-controlled ( $10^9 \text{ M}^{-1}\text{s}^{-1}$ ), the reaction of ferric LPO with OSCN<sup>-</sup> ( $0.06 \text{ s}^{-1}$ ) would not be competitive with the reaction of OSCN<sup>-</sup> with TNB ( $90 \text{ s}^{-1}$  for our Figure 3). Not only is there at least a  $10^3$  difference in the rate constants (more likely  $10^9$  difference if the rate constant is the same for LPO and MPO), but the reaction does not explain our results (e.g., Figure 2).

**Modeling the Halogen Cycle Mechanism of LPO.** Mathematica was used to model the LPO halogen cycle (Figure 1A). In the model EE = LPO, Ox = H<sub>2</sub>O<sub>2</sub>, EOx = Cpd I, S = SCN<sup>-</sup>, P = OSCN<sup>-</sup>. The rate constants are taken from Table 1.

```
Clear[EE, ES, EOx, S, Ox, P, Ox0, t, k1, k2];

equations = {
  EE'[t] == -k1*EE[t]*Ox[t] + k2*EOx[t]*S,
  EOx'[t] == +k1*EE[t]*Ox[t] - k2*EOx[t]*S,
  Ox'[t] == -k1*EE[t]*Ox[t],
  P'[t] == k2*EOx[t]*S,
  EE[0] == EE0,
  EOx[0] == 0,
  Ox[0] == Ox0,
  P[0] == 0
};

k1 = 1.1*10^7;
k2 = 2*10^8;
EE0 = 1*10^-6;
S = 1*10^-4;
Ox0 = 5*10^-5;

timeframe = 5;

answer = NDSolve[equations, P[t], {t, 0, timeframe};

EE[t_] = EE[t] /. answer;
EOx[t_] = EOx[t] /. answer;
Ox[t_] = Ox[t] /. answer;
P[t_] = P[t] /. answer;
```

**Modeling of the Proposed Mechanism of LPO.** Mathematica was used to model the mechanism of Figure 1B. In the model  $EE = \text{LPO}$ ,  $ES = \text{LPO-SCN}^-$ ,  $Ox = \text{H}_2\text{O}_2$ ,  $EOx = \text{LPO-H}_2\text{O}_2 = \text{Cpd I}^*$ ,  $S = \text{SCN}^-$ , and  $P = \text{OSCN}^-$ . The rate constants are taken from Table 1.

```
Clear[EE,ES,EOx,S, Ox, P,Ox0, t,k1, km1,k2, km2, k3];

equations = {
  EE'[t] == -k1*EE[t]*S+km1*ES[t]-k2*EE[t]*Ox[t]+km2*EOx[t]+k3*ES[t]*Ox[t],
  ES'[t] == k1*EE[t]*S-km1*ES[t]-k3*ES[t]*Ox[t],
  EOx'[t] == k2*EE[t]*Ox[t]-km2*EOx[t],
  Ox'[t] == -k3*ES[t]*Ox[t],
  P'[t] == k3*ES[t]*Ox[t],
  EE[0] == EE0,
  ES[0] == 0,
  EOx[0] == 0,
  Ox[0] == Ox0,
  P[0] == 0};

k1=1.4*10^9;
km1=3940;
k2=3.48*10^7;
km2=2.07;
k3=1*10^7;
EE0=1*10^-6;
S=1*10^-4;
Ox0=5*10^-5;

timeframe = 6;

answer=NDSolve[equations, {EE[t], ES[t], EOx[t],S[t], Ox[t], P[t]}, {t,0,timeframe}];

EE[t_]=EE[t]/.answer;
ES[t_]=ES[t]/.answer;
EOx[t_]=EOx[t]/.answer;
S[t_]=S[t]/.answer;
Ox[t_]=Ox[t]/.answer;
P[t_]=P[t]/.answer;
```

**Fitting Experimental Data Using the Proposed Mechanism of Figure 1B.** Experimental kinetic traces were fit to the model of Figure 1B at low  $[\text{SCN}^-]$  to determine rate constants  $k_1$ ,  $k_{-1}$ ,  $k_2$ ,  $k_{-2}$ , and  $k_3$ . The reactions involving the TNB assay itself were omitted so as not to overcomplicate the model. The molar extinction coefficient,  $\epsilon_{412}(\text{TNB}) = 14,150 \text{ M}^{-1}\text{cm}^{-1}$ , was used to calculate  $[\text{OSCN}^-]$ . ParametricNDSolve was used to model the mechanism and NonlinearRegression was used to calculate fitted rate constants. Initial parameters were determined by allowing all rate constants to vary for a set of data where the pre-equilibrium and steady-state reaction could both be clearly observed, as in Figure 2B. The rate constants

calculated for well-resolved data were used as initial parameter values to fit the traces which were less well-defined. In some cases, where the pre-equilibrium reaction and steady-state reactions were especially underdetermined, such as traces C and D in Figure 2, appropriate rate constants were fixed to allow the calculation of the rate constants for the dominant reaction which could be clearly observed in the trace. In the model  $EE = LPO$ ,  $ES = LPO-SCN^-$ ,  $Ox = H_2O_2$ ,  $EOx = LPO-H_2O_2 = Cpd\ I^*$ ,  $S = SCN^-$ , and  $P = OSCN^-$ .

```
SetDirectory["path"];
data1=ReadList["filename ",{Number,Number}];

Clear[EE,ES,EOx,S,Ox,P,k1,k2,k3,k4,k5];

totaltime=6;

S=5.3*10^-5;

model=ParametricNDSolveValue[
{
EE'[t] == -k1*EE[t]*S+k2*ES[t]-k3*EE[t]*Ox[t]+k4*EOx[t]+k5*ES[t]*Ox[t],
ES'[t] == k1*EE[t]*S-k2*ES[t]-k5*ES[t]*Ox[t],
EOx'[t] == k3*EE[t]*Ox[t]-k4*EOx[t],
Ox'[t] == -k5*ES[t]*Ox[t],
P'[t] == k5*ES[t]*Ox[t],
EE[0] == 1.20*10^-6,
ES[0]== 0,
EOx[0]== 0,
Ox[0]==4.0*10^-5,
P[0]== 0},P,{t,0,totaltime},{k1,k2,k3,k4,k5}];

Clear[EE,ES,EOx,S,Ox,P,k1,k2,k3,k4,k5];
Needs["NonlinearRegression`"]
NonlinearRegress[data1,model[k1,k2,k3,k4,k5][t],{{k1,1*10^9},{k2,4000},{k3,3*10^7},{k4,2},{k5,9*10^6}},t]
```

**Modeling the Conversion of Cpd I-[Fe<sup>IV</sup>=O,  $\pi^+$ ] to Cpd I\*-[Fe<sup>IV</sup>-OH,  $aa^+$ ] During Catalysis.** To explore the possible role of Cpd I-[Fe<sup>IV</sup>=O,  $\pi^+$ ], Mathematica was used to model the mechanism of Figure 1A with the inclusion of the conversion of Cpd I-[Fe<sup>IV</sup>=O,  $\pi^+$ ] to Cpd I\*-[Fe<sup>IV</sup>-OH,  $aa^+$ ]. The initial concentrations were the same as Figure 5. In the model  $EE = LPO$ ,  $ES = LPO-SCN^-$ ,  $Ox = H_2O_2$ ,  $EOx = LPO-H_2O_2 = Cpd\ I^*$ ,  $S = SCN^-$ , and  $P = OSCN^-$ . The rate constants are taken from Table 1 and (3). The results of Figure S15 predict the majority of the steady-state species formed is LPO-[Fe<sup>III</sup>], with a small amount of Cpd I-[Fe<sup>IV</sup>=O,  $\pi^+$ ]. Also, the production of  $OSCN^-$  is expected to be pseudo-first-order (cf. Figure 4B).

```
Clear[EE, EOx, EOH, Ox, S, P, t, k1, k2, k3];

equations = {
```

```

EE'[t] == -k1*EE[t]*Ox[t] + k2*EOx[t]*S[t],
EOx'[t] == k1*EE[t]*Ox[t] - k2*EOx[t]*S[t],
Ox'[t] == -k1*EE[t]*Ox[t],
S'[t] == -k2*EOx[t]*S[t],
P'[t] == k2*EOx[t]*S[t],
EOH'[t] == k3*EOH[t],
EE[0] == EE0,
EOx[0] == 0,
EOH[0] == 0,
Ox[0] == Ox0,
S[0] == S0,
P[0] == 0
};

k1 = 1.1*10^7;
k2 = 2*10^8;
k3 = 2;
EE0 = 1.2*10^-6;
S0 = 5.2*10^-5;
Ox0 = 4*10^-5;

timeframe = 0.5;

answer = NDSolve[
  equations, {EE[t], EOx[t], EOH[t], S[t], P[t], Ox[t]}, {t, 0,
    timeframe}];

EE[t_] = EE[t] /. answer;
EOx[t_] = EOx[t] /. answer;
EOH[t_] = EOH[t] /. answer;
S[t_] = S[t] /. answer;
P[t_] = P[t] /. answer;
Ox[t_] = Ox[t] /. answer;

```

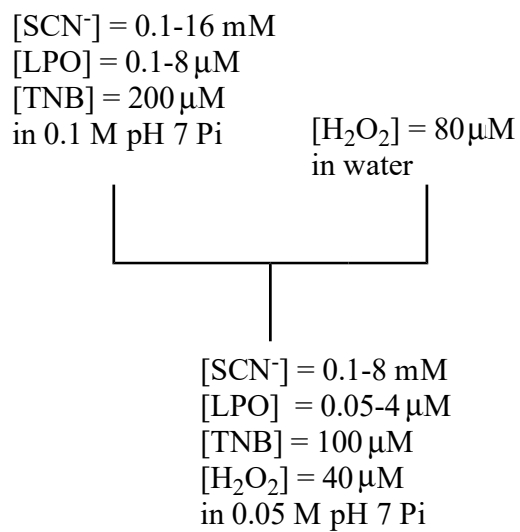

**Figure S1.** Reaction mixing scheme for the single mixing stopped-flow experiment to observe the rate of the LPO-catalyzed oxidation of  $\text{SCN}^-$  by  $\text{H}_2\text{O}_2$  at pH 7.

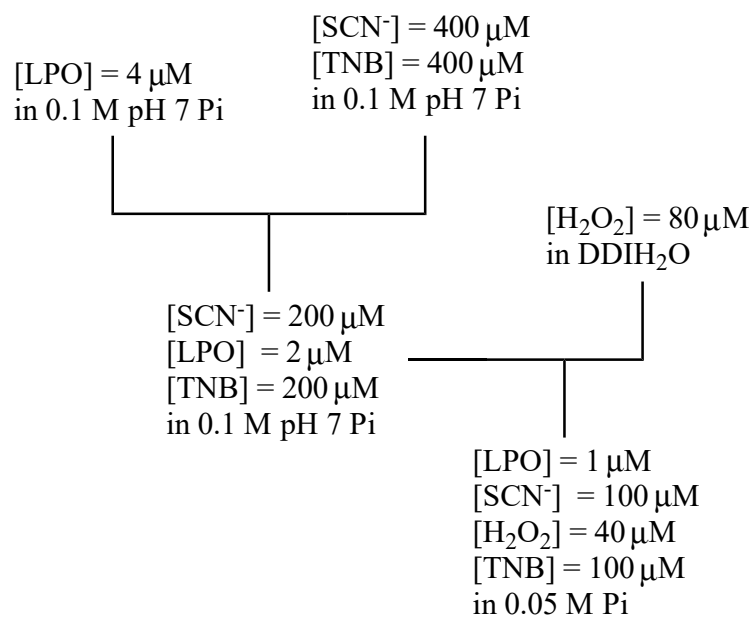

**Figure S2.** Reaction mixing scheme for the double mixing stopped-flow experiment to observe the effect of mixing LPO and SCN<sup>-</sup> in the first mixing cycle prior to the addition of H<sub>2</sub>O<sub>2</sub> on the LPO-catalyzed oxidation of SCN<sup>-</sup> by H<sub>2</sub>O<sub>2</sub> at neutral pH. This mixing scheme was used to produce the data in Figure 3A.

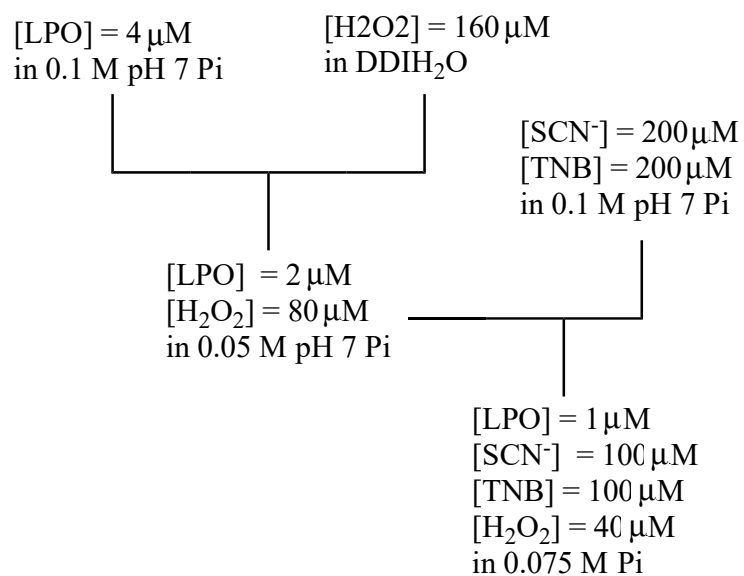

**Figure S3.** Reaction mixing scheme for the double mixing stopped-flow experiment to observe the effect of mixing LPO and H<sub>2</sub>O<sub>2</sub> in the first mixing cycle prior to the addition of SCN<sup>-</sup> on the LPO-catalyzed oxidation of SCN<sup>-</sup> by H<sub>2</sub>O<sub>2</sub> at neutral pH. This mixing scheme was used to produce the data in Figure 3B.



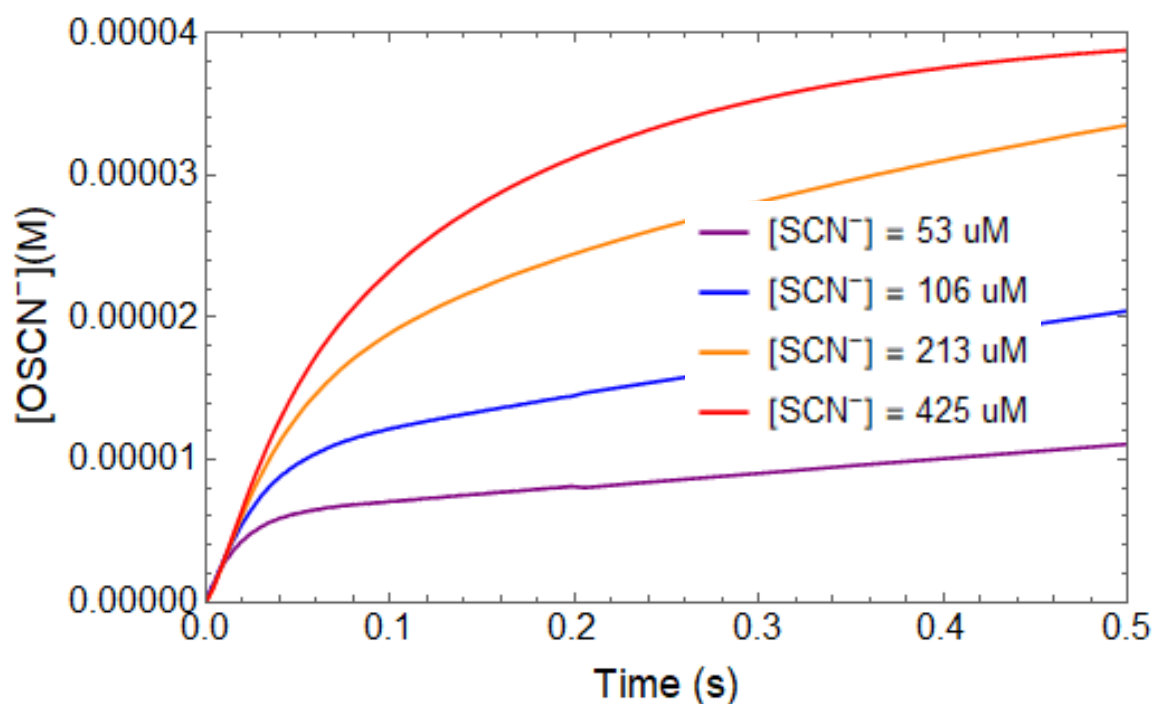

**Figure S4.** Isolated view of the pre-steady-state reaction observed in Figure 2 (left) for the LPO-catalyzed oxidation of  $[\text{SCN}^-]$  by  $\text{H}_2\text{O}_2$  under low  $[\text{SCN}^-]$  conditions. Post-mixing concentrations were  $[\text{LPO}] = 1.2 \mu\text{M}$ ,  $[\text{H}_2\text{O}_2] = 40 \mu\text{M}$ ,  $[\text{TNB}] = 100 \mu\text{M}$ , and  $[\text{SCN}^-] = 52, 106, 213, \text{ and } 425 \mu\text{M}$ . Notably, the initial reaction rates do not vary and the number of enzyme turnovers that occur during the pre-steady-state reaction increase with increasing  $[\text{SCN}^-]$ .

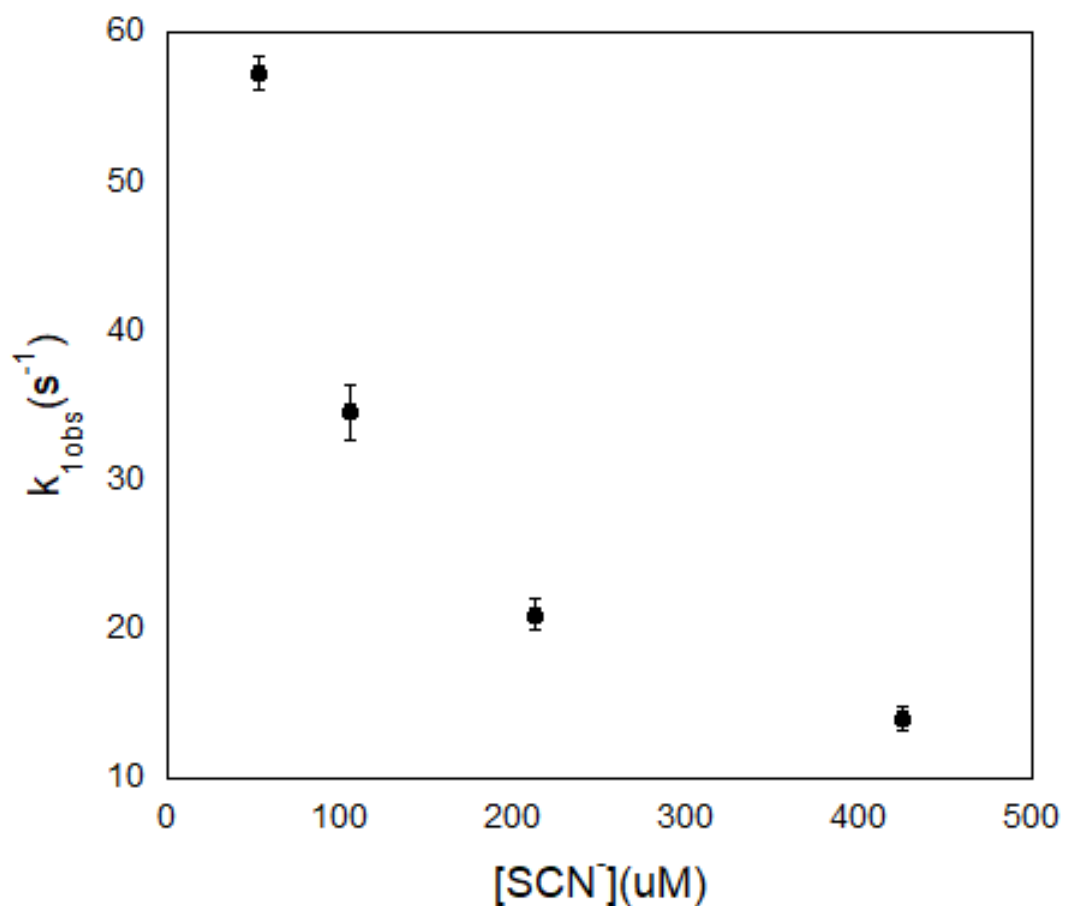

**Figure S5.** Observed first-order rate constants for the pre-steady-state reaction in the LPO-catalyzed oxidation of  $SCN^-$  by  $H_2O_2$ . Post-mixing concentrations were  $[LPO] = 1.2 \mu M$ ,  $[H_2O_2] = 40 \mu M$ ,  $[TNB] = 100 \mu M$ , and  $[SCN^-] = 52, 106, 213$ , and  $425 \mu M$ . The estimated error shown by the error bars for the individual rate constants is for a least-squares fit of an average of five kinetic traces and has been multiplied by a factor of 10 so that the error bars would be visible on the plot.

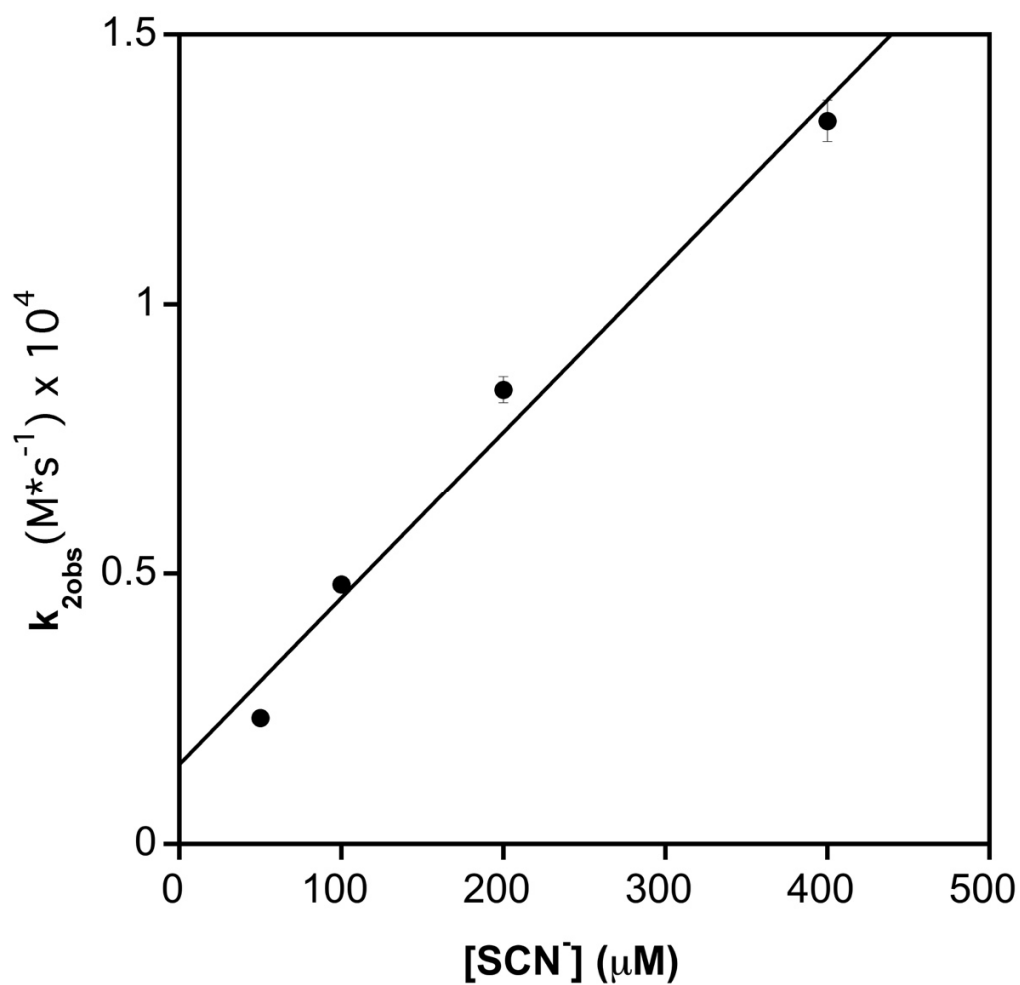

**Figure S6.** Effect of varying  $[SCN^-]$  on the rate of the steady-state reaction during the LPO-catalyzed oxidation of  $SCN^-$  by  $H_2O_2$ . Post-mixing concentrations were  $[LPO] = 0.1 \mu M$ ,  $[H_2O_2] = 40 \mu M$ ,  $[TNB] = 100 \mu M$ , and  $[SCN^-] = 50, 100, 200$ , and  $400 \mu M$ . The estimated error shown by the error bars for the individual rate constants is for a least-squares fit of an average of five kinetic traces and has been multiplied by a factor of 10 so that the error bars would be visible on the plot.

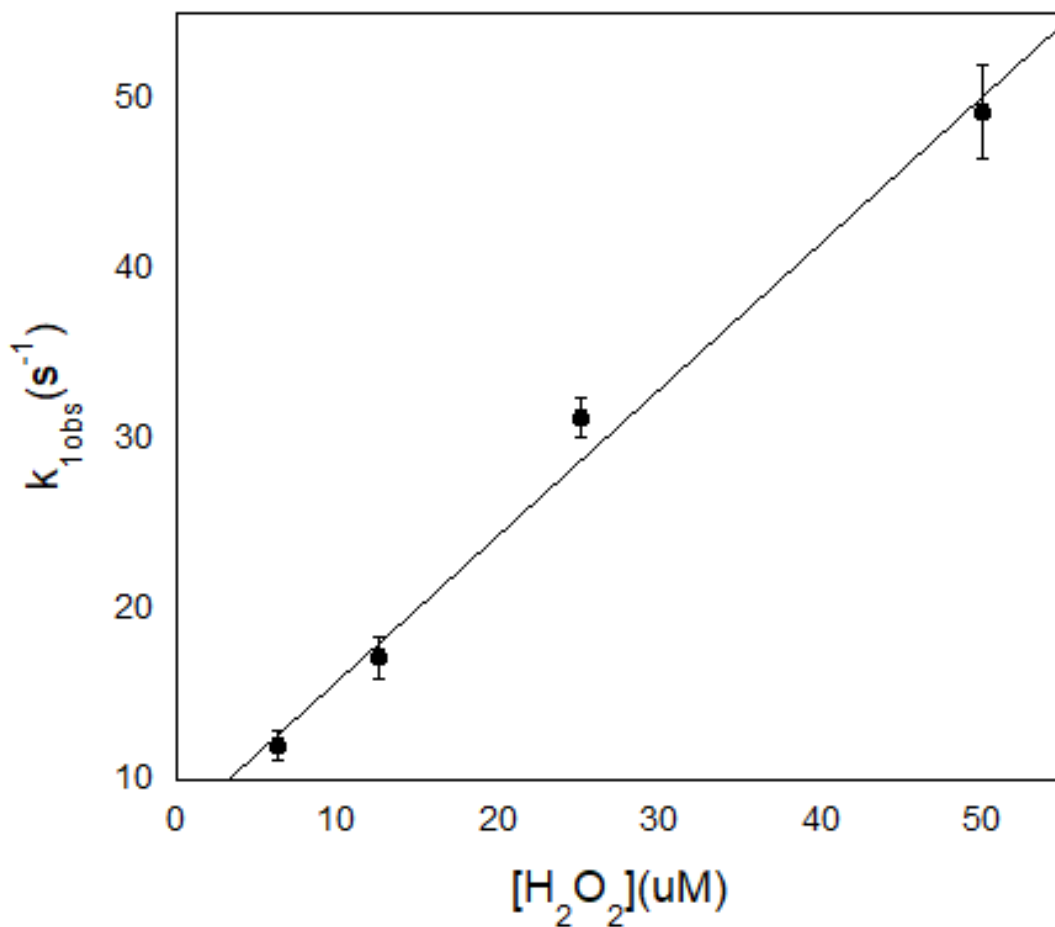

**Figure S7.** Effect of [H<sub>2</sub>O<sub>2</sub>] on k<sub>1obs</sub> for the LPO-catalyzed oxidation of SCN<sup>-</sup> by H<sub>2</sub>O<sub>2</sub> under conditions of low concentration of [SCN<sup>-</sup>]. Post-mixing concentrations were [LPO] = 0.5 μM, [SCN<sup>-</sup>] = 100 μM, [TNB] = 100 μM, and [H<sub>2</sub>O<sub>2</sub>] = 6.25, 12.5, 25, and 50 μM. The estimated error shown by the error bars for the individual rate constants is for a least-squares fit of an average of five kinetic traces and has been multiplied by a factor of 10 so that the error bars would be visible on the plot.

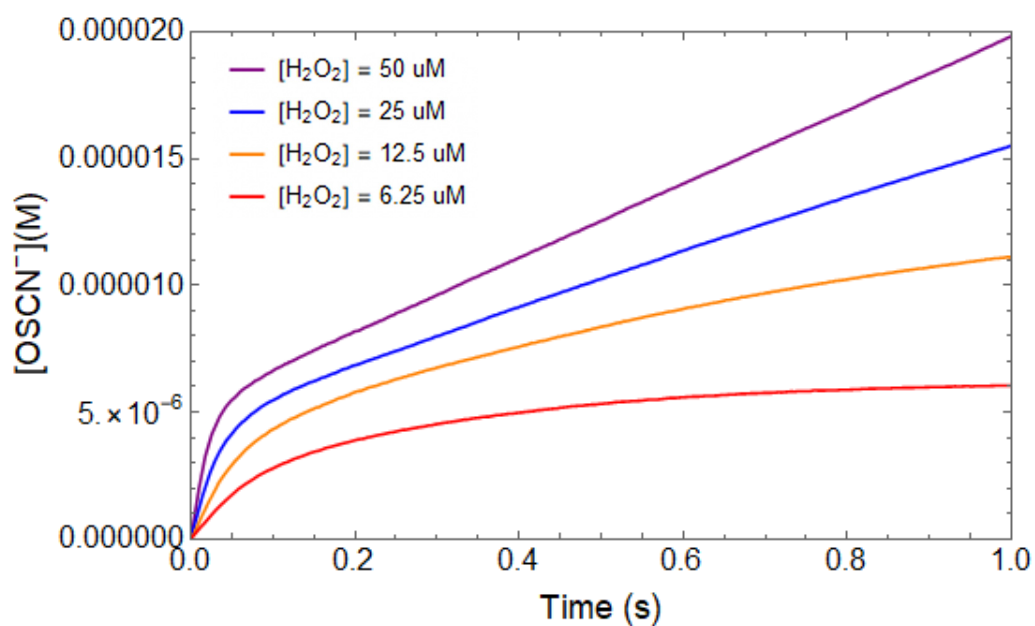

**Figure S8.** Kinetic traces of the pre-steady-state reaction observed during the LPO-catalyzed oxidation of  $\text{SCN}^-$  by  $\text{H}_2\text{O}_2$  as  $[\text{H}_2\text{O}_2]$  was varied. Post-mixing concentrations were  $[\text{SCN}^-] = 100 \mu\text{M}$ ,  $[\text{LPO}] = 0.5 \mu\text{M}$ ,  $[\text{TNB}] = 100 \mu\text{M}$ , and  $[\text{H}_2\text{O}_2] = 6.25, 12.5, 25, \text{ and } 50 \mu\text{M}$ .

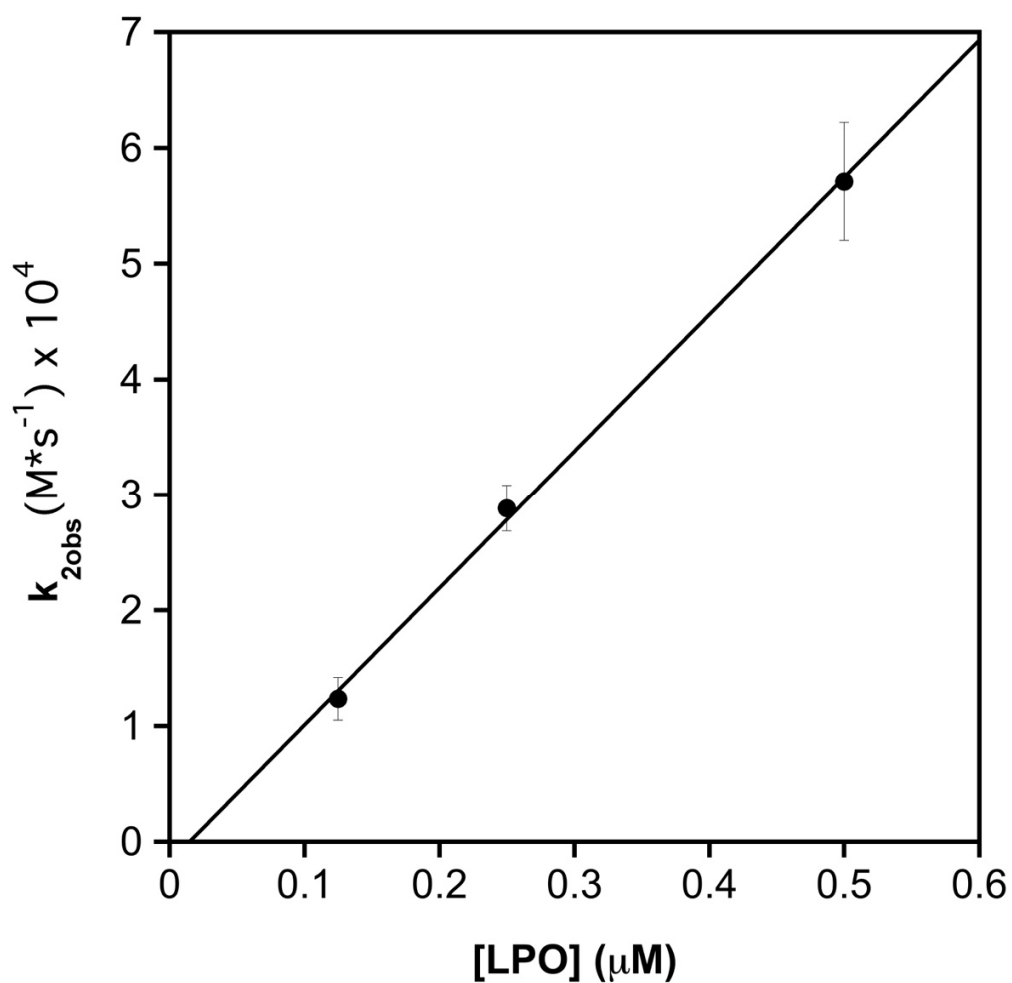

**Figure S9.** Steady-state reaction rate dependence on [LPO] for the LPO-catalyzed oxidation of  $SCN^-$  by  $H_2O_2$ . Post-mixing concentrations were  $[SCN^-] = 200 \mu M$ ,  $[H_2O_2] = 40 \mu M$ ,  $[TNB] = 100 \mu M$ , and  $[LPO] = 0.125, 0.25$ , and  $0.5 \mu M$ . The estimated error shown by the error bars for the individual rate constants is for a least-squares fit of an average of five kinetic traces.

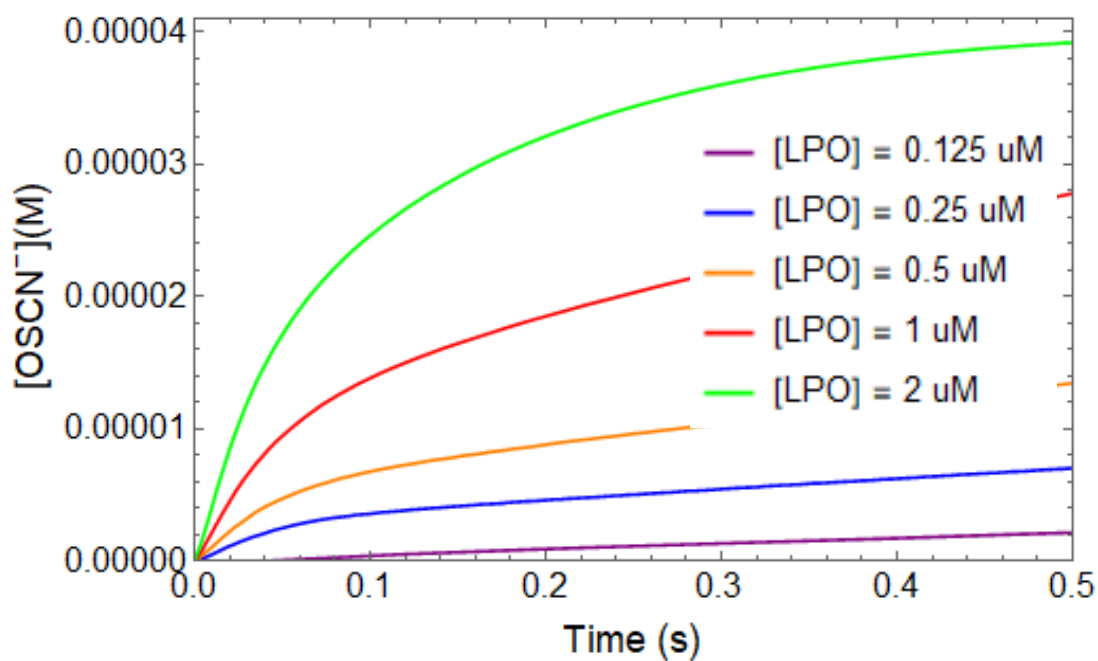

**Figure S10.** Kinetic traces of pre-steady-state reaction of the LPO-catalyzed oxidation of  $\text{SCN}^-$  by  $\text{H}_2\text{O}_2$  as  $[\text{LPO}]$  is varied. Post-mixing concentrations were  $[\text{SCN}^-] = 200 \mu\text{M}$ ,  $[\text{H}_2\text{O}_2] = 40 \mu\text{M}$ ,  $[\text{TNB}] = 100 \mu\text{M}$ , and  $[\text{LPO}] = 0.125\text{-}2 \mu\text{M}$

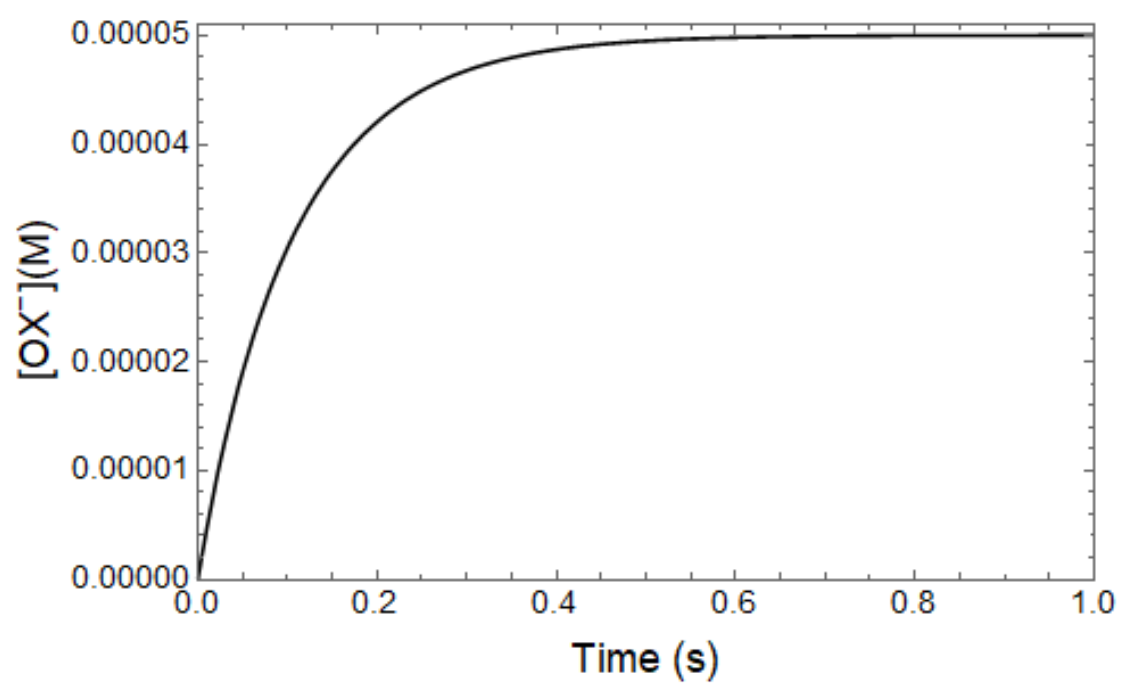

**Figure S11.** Simulated trace of  $[OSCN^-]$  for the proposed mechanism for the LPO-catalyzed oxidation of  $SCN^-$  by  $H_2O_2$  under conditions of high  $[SCN^-]$ .



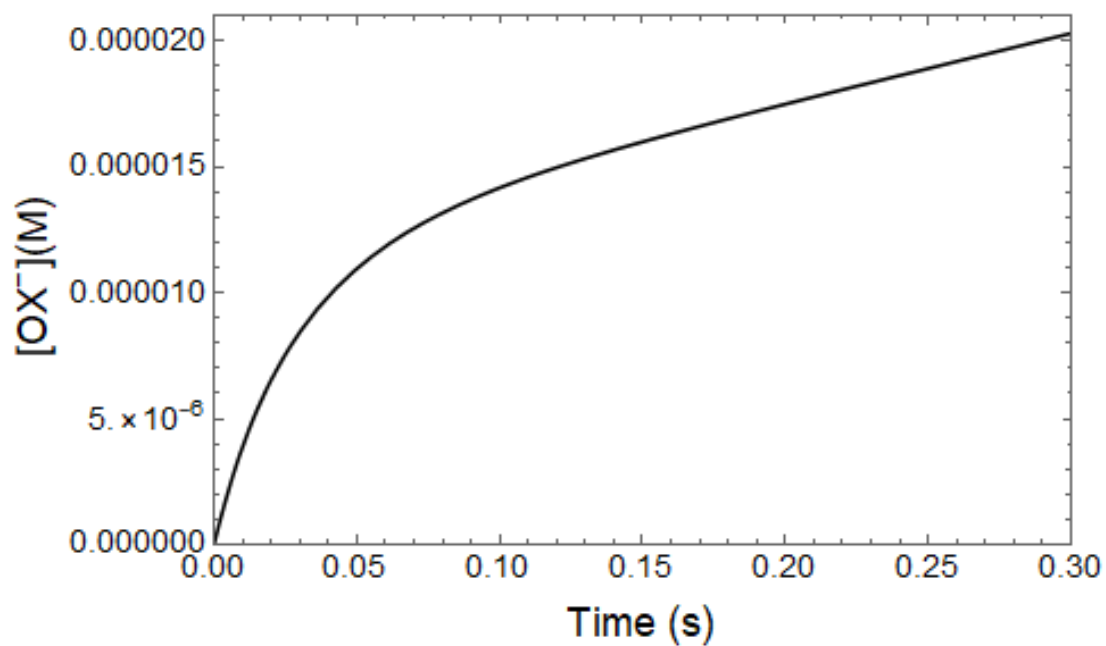

**Figure S12.** Simulated trace of  $[OSCN^-]$  during the pre-steady-state reaction for the proposed mechanism for the LPO-catalyzed oxidation of  $SCN^-$  by  $H_2O_2$  under conditions of low  $[SCN^-]$ .

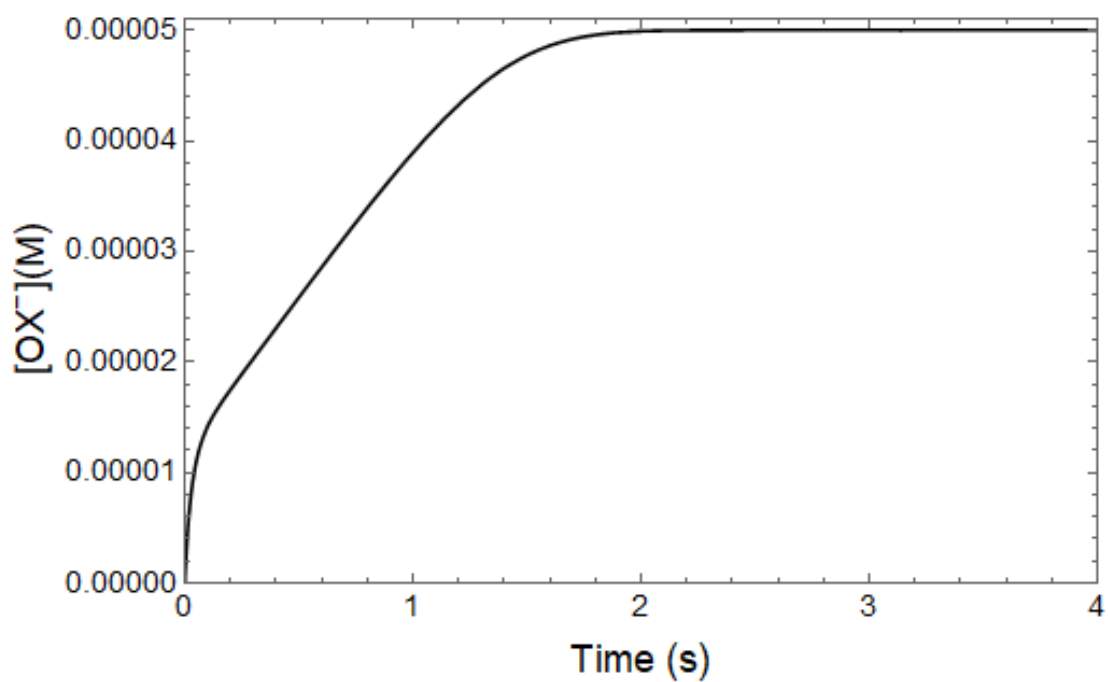

**Figure S13.** Simulated trace of  $[\text{OSCN}^-]$  during the reaction for the proposed mechanism for the LPO-catalyzed oxidation of  $\text{SCN}^-$  by  $\text{H}_2\text{O}_2$  under conditions of low  $[\text{SCN}^-]$ .

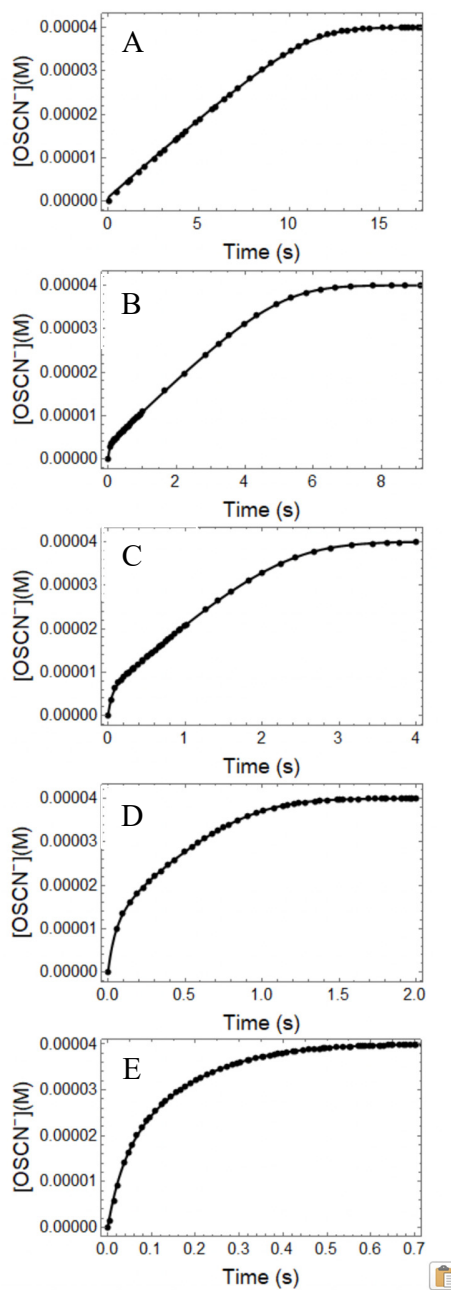

**Figure S14.** Fitted kinetic traces for the LPO-catalyzed oxidation of  $\text{SCN}^-$  by  $\text{H}_2\text{O}_2$  as  $[\text{LPO}]$  was varied. Post-mixing concentrations were  $[\text{SCN}^-] = 200 \mu\text{M}$ ,  $[\text{H}_2\text{O}_2] = 40 \mu\text{M}$ ,  $[\text{TNB}] = 100 \mu\text{M}$ , and  $[\text{LPO}] = 0.125, 0.25, 0.5, 1, \text{ and } 2 \mu\text{M}$  for A, B, C, D, and E, respectively. Rate constants produced by these fits are given in Table S8

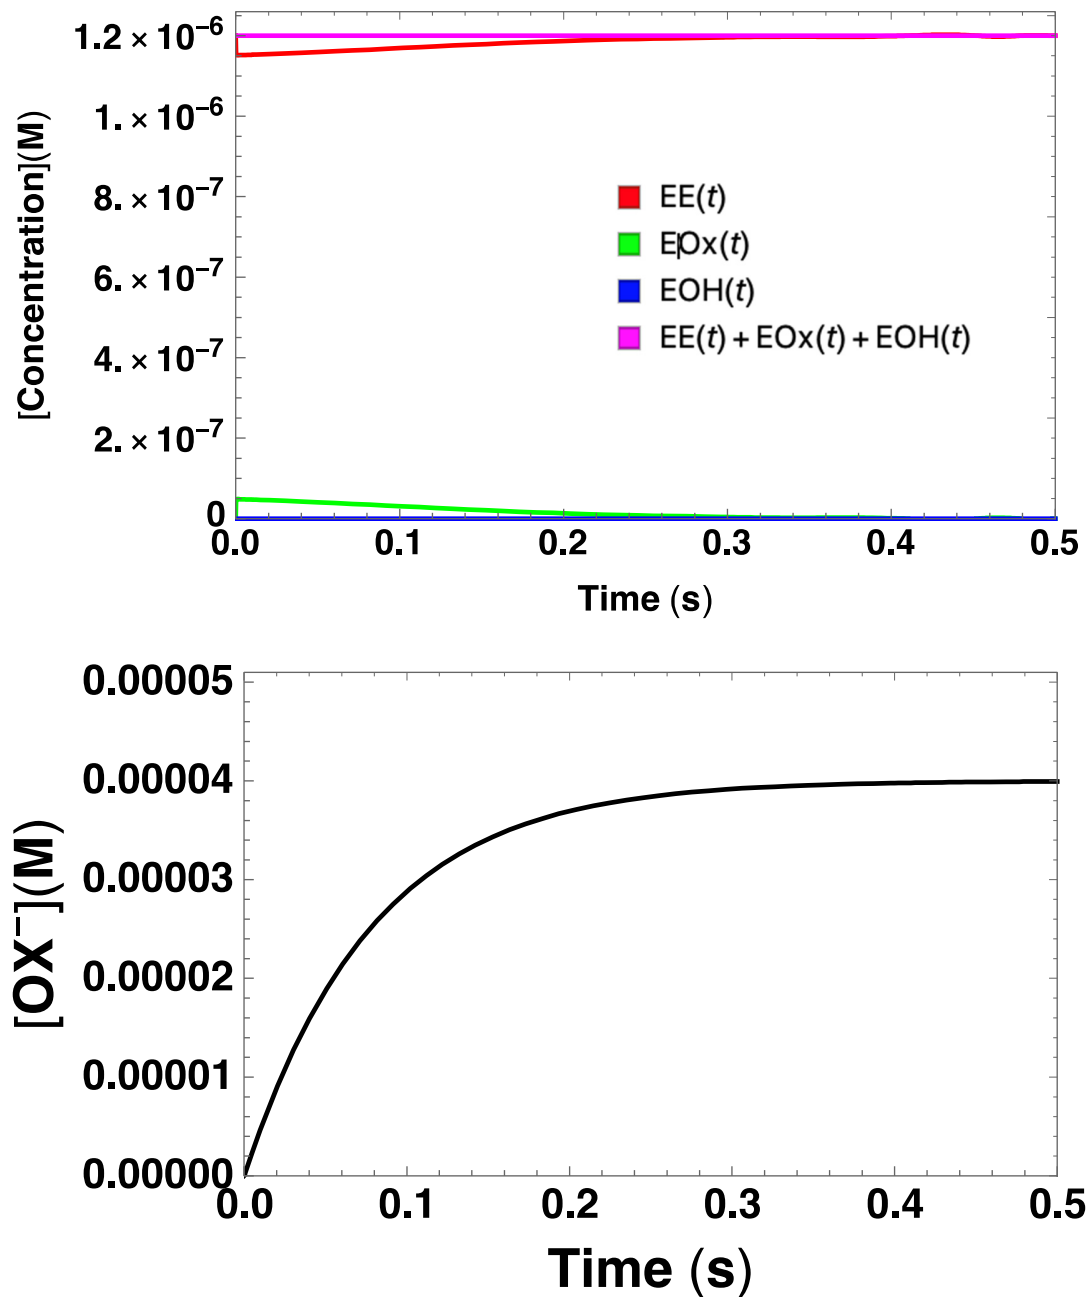

Figure S15. Simulated concentrations during the LPO-catalyzed oxidation of  $\text{SCN}^-$  by  $\text{H}_2\text{O}_2$  for the mechanism of Figure 1A with the additional known step for the conversion of Cpd I to Cpd I\*: Red =  $\text{LPO-}[\text{Fe}^{\text{III}}]$ , Green = Cpd I, Blue = Cpd I\* (not observed), Black =  $\text{OSCN}^-$ ,  $k_1 = 1.1 \times 10^7 \text{ M}^{-1}\text{s}^{-1}$ ,  $k_2 = 2 \times 10^8 \text{ M}^{-1}\text{s}^{-1}$ ,  $k_3 = 2 \text{ s}^{-1}$ ,  $[\text{LPO}]_0 = 1.2 \times 10^{-6} \text{ M}$ ,  $[\text{H}_2\text{O}_2]_0 = 4 \times 10^{-5} \text{ M}$ ,  $[\text{SCN}^-]_0 = 5.2 \times 10^{-5} \text{ M}$ . This simulation assumes the  $[\text{SCN}^-]$  remains constant, as expected for the stoichiometry of the TNB assay.

**Table S1.** Observed rate of the LPO-catalyzed oxidation of  $\text{SCN}^-$  by  $\text{H}_2\text{O}_2$  as a function of  $[\text{H}_2\text{O}_2]$ .<sup>a</sup>

| $[\text{H}_2\text{O}_2]$ ( $\mu\text{M}$ ) | $k_{\text{obs}}$ ( $\text{s}^{-1}$ ) <sup>b</sup> | Model Predicted $k_{\text{obs-sim}}$ ( $\text{s}^{-1}$ ) |
|--------------------------------------------|---------------------------------------------------|----------------------------------------------------------|
| 7.5                                        | 6.56(4)                                           | 11.00                                                    |
| 15                                         | 5.65(3)                                           | 11.00                                                    |
| 30                                         | 7.02(8)                                           | 11.00                                                    |
| Average                                    | 6.4(7) <sup>c</sup>                               | 11.00                                                    |

<sup>a</sup>A single mixing experiment with constant post-mixing concentrations of  $[\text{LPO}] = 1 \mu\text{M}$ ,  $[\text{SCN}^-] = 4 \text{ mM}$ ,  $[\text{TNB}] = 70 \mu\text{M}$ , and  $[\text{H}_2\text{O}_2] = 7.5\text{-}30 \mu\text{M}$ .

<sup>b</sup>The estimated error, given by the parenthetical digits, for the individual rate constants is for a least-squares fit of an average of five kinetic traces.

<sup>c</sup>The average error was determined by the standard deviation of the individual fits.

**Table S2.** Observed rate of the LPO-catalyzed oxidation of  $\text{SCN}^-$  by  $\text{H}_2\text{O}_2$  as a function of  $[\text{SCN}^-]$ .<sup>a</sup>

| $[\text{SCN}^-]$ (mM) | $k_{\text{obs}}$ ( $\text{s}^{-1}$ ) <sup>b</sup> | Model Predicted $k_{\text{obs-sim}}$ ( $\text{s}^{-1}$ ) |
|-----------------------|---------------------------------------------------|----------------------------------------------------------|
| 1.2                   | 6.29(3)                                           | 11.00                                                    |
| 2.1                   | 7.96(2)                                           | 11.00                                                    |
| 4.3                   | 8.839(8)                                          | 11.00                                                    |
| 8.6                   | 8.93(1)                                           | 11.00                                                    |
| Average <sup>c</sup>  | —                                                 | 11.00                                                    |

<sup>a</sup>Single mixing experiment with constant post-mixing concentrations of  $[\text{LPO}] = 1 \mu\text{M}$ ,  $[\text{H}_2\text{O}_2] = 40 \mu\text{M}$ , and  $[\text{TNB}] = 100 \mu\text{M}$ .

<sup>b</sup>The estimated error, given by the parenthetical digits, for the individual rate constants is for a least-squares fit of an average of five kinetic traces.

<sup>c</sup>The average of the experimentally observed rate constants was not calculated due to systematic error.

**Table S3.** Observed initial rates of the LPO-catalyzed oxidation of  $\text{SCN}^-$  by  $\text{H}_2\text{O}_2$  as a function of  $[\text{SCN}^-]$ .<sup>a</sup>

| $[\text{SCN}^-]$ ( $\mu\text{M}$ ) | $k_{\text{obs}}$ ( $\text{M}\cdot\text{s}^{-1}$ ) <sup>b</sup> |
|------------------------------------|----------------------------------------------------------------|
| 53                                 | $1.00(1)\times 10^{-3}$                                        |
| 106                                | $1.020(8)\times 10^{-3}$                                       |
| 213                                | $1.095(4)\times 10^{-3}$                                       |
| 425                                | $1.124(7)\times 10^{-3}$                                       |
| Average                            | $1.06(5)\times 10^{-3}$                                        |

<sup>a</sup>Single mixing experiment with constant post-mixing concentrations of  $[\text{LPO}] = 1.2 \mu\text{M}$ ,  $[\text{H}_2\text{O}_2] = 40 \mu\text{M}$ , and  $[\text{TNB}] = 100 \mu\text{M}$ .

<sup>b</sup>The estimated error, given by the parenthetical digits, for the individual rate constants is for a least-squares fit of an average of five kinetic traces.

**Table S4.** Effect of varying  $[\text{H}_2\text{O}_2]$  on the rate of the steady-state reaction of the LPO-catalyzed oxidation of  $\text{SCN}^-$  by  $\text{H}_2\text{O}_2$ .<sup>a</sup>

| $[\text{H}_2\text{O}_2]$ ( $\mu\text{M}$ ) | $k_{2\text{obs}}$ ( $\text{M}\cdot\text{s}^{-1}$ ) <sup>b</sup> |
|--------------------------------------------|-----------------------------------------------------------------|
| 5                                          | $3.00(1)\times 10^{-6}$                                         |
| 10                                         | $4.01(1)\times 10^{-6}$                                         |
| 20                                         | $4.54(1)\times 10^{-6}$                                         |
| 40                                         | $4.65(1)\times 10^{-6}$                                         |
| Average                                    | $4.0(6)\times 10^{-6}$                                          |

<sup>a</sup>The post-mixing concentrations were  $[\text{LPO}] = 0.1 \mu\text{M}$ ,  $[\text{SCN}^-] = 100 \mu\text{M}$ ,  $[\text{TNB}] = 100 \mu\text{M}$ , and  $[\text{H}_2\text{O}_2] = 5, 10, 20$ , and  $40 \mu\text{M}$ .

<sup>b</sup>The estimated error, given by the parenthetical digits, for the individual rate constants is for a least-squares fit of an average of five kinetic traces.

<sup>c</sup>The average error of the model predicted rate constants was determined by the standard deviation of the individual fits.



**Table S5.** Effect of varying [LPO] on the rate of the pre-steady-state reaction for the LPO-catalyzed oxidation of SCN<sup>-</sup> by H<sub>2</sub>O<sub>2</sub>.<sup>a</sup>

| [LPO] (μM) | k <sub>1obs</sub> (s <sup>-1</sup> ) <sup>b</sup> |
|------------|---------------------------------------------------|
| 0.25       | 23.5(1)                                           |
| 0.5        | 23.07(9)                                          |
| 1          | 20.7(1)                                           |
| Average    | 22(2) <sup>c</sup>                                |

<sup>a</sup>Post-mixing concentrations were [SCN<sup>-</sup>] = 200 μM, [H<sub>2</sub>O<sub>2</sub>] = 40 μM, [TNB] = 100 μM, and [LPO] = 0.25, 0.5, and 1 μM.

<sup>b</sup>The estimated error, given by the parenthetical digits, for the individual rate constants is for a least-squares fit of an average of five kinetic traces.

<sup>c</sup>The average error was calculated by the standard deviation of the individual fits.

**Table S6.** Fitted rate constants for the proposed mechanism of the LPO-catalyzed oxidation of SCN<sup>-</sup> by H<sub>2</sub>O<sub>2</sub> as [SCN<sup>-</sup>] was varied.<sup>a</sup>

| [SCN <sup>-</sup> ]( $\mu$ M) | $k_1$ (M <sup>-1</sup> ·s <sup>-1</sup> ) <sup>b</sup> | $k_{-1}$ (s <sup>-1</sup> ) <sup>b</sup> | $k_2$ (M <sup>-1</sup> ·s <sup>-1</sup> ) <sup>b</sup> | $k_{-2}$ (s <sup>-1</sup> ) <sup>b</sup> | $k_3$ (M <sup>-1</sup> ·s <sup>-1</sup> ) <sup>b</sup> |
|-------------------------------|--------------------------------------------------------|------------------------------------------|--------------------------------------------------------|------------------------------------------|--------------------------------------------------------|
| 53                            | 1.31(7)x10 <sup>9</sup>                                | 4.6(3)x10 <sup>3</sup>                   | 2.23(3)x10 <sup>7</sup>                                | 1.556(4)                                 | 8.62(3)x10 <sup>6</sup>                                |
| 106                           | 1.33(3)x10 <sup>9</sup>                                | 3.9(3)x10 <sup>3</sup>                   | 3.04(1) x10 <sup>7</sup>                               | 1.760(3)                                 | 9.24(3)x10 <sup>6</sup>                                |
| 213                           | 1.30 x10 <sup>9</sup> (fixed)                          | 3.93x10 <sup>3</sup> (fixed)             | 2.81(2) x10 <sup>7</sup>                               | 1.68(1)                                  | 9.27(4)x10 <sup>6</sup>                                |
| 425                           | 1.30x10 <sup>9</sup> (fixed)                           | 3.93x10 <sup>3</sup> (fixed)             | 2.65(3) x10 <sup>7</sup>                               | 1.72(fixed)                              | 9.44(4) x10 <sup>6</sup>                               |
| Average <sup>c</sup>          | 1.32(1)x10 <sup>9</sup>                                | 4.3(5)x10 <sup>3</sup>                   | 2.7(3)x10 <sup>7</sup>                                 | 1.7(1)                                   | 9.1(4)x10 <sup>6</sup>                                 |

<sup>a</sup>The post-mixing concentrations were [LPO] = 1.2  $\mu$ M, [H<sub>2</sub>O<sub>2</sub>] = 40  $\mu$ M, [TNB] = 100  $\mu$ M, and [SCN<sup>-</sup>] = 53, 106, 213, and 425  $\mu$ M.

<sup>b</sup>The estimated error, given by the parenthetical digits, for the individual rate constants is for a least-squares fit.

<sup>c</sup>The average error was calculated by the standard deviation of the individual fits.

**Table S7.** Fitted rate constants for the proposed mechanism of the LPO-catalyzed oxidation of SCN<sup>-</sup> by H<sub>2</sub>O<sub>2</sub> as [H<sub>2</sub>O<sub>2</sub>] was varied.<sup>a</sup>

| [H <sub>2</sub> O <sub>2</sub> ]( $\mu$ M) | $k_1$ (M <sup>-1</sup> ·s <sup>-1</sup> ) <sup>b</sup> | $k_{-1}$ (s <sup>-1</sup> ) <sup>b</sup> | $k_2$ (M <sup>-1</sup> ·s <sup>-1</sup> ) <sup>b</sup> | $k_{-2}$ (s <sup>-1</sup> ) <sup>b</sup> | $k_3$ (M <sup>-1</sup> ·s <sup>-1</sup> ) <sup>b</sup> |
|--------------------------------------------|--------------------------------------------------------|------------------------------------------|--------------------------------------------------------|------------------------------------------|--------------------------------------------------------|
| 50                                         | 1.58(2)x10 <sup>9</sup>                                | 3.5(3)x10 <sup>3</sup>                   | 5.91(3x10 <sup>-3</sup> )x10 <sup>7</sup>              | 2.58(2)                                  | 1.84(4)x10 <sup>7</sup>                                |
| 25                                         | 1.8(4)x10 <sup>9</sup>                                 | 3.2(7)x10 <sup>3</sup>                   | 4.8(4)x10 <sup>7</sup>                                 | 2.14(2)                                  | 1.110(7)x10 <sup>7</sup>                               |
| 12.5                                       | 1.65x10 <sup>9</sup> (fixed)                           | 3.30x10 <sup>3</sup> (fixed)             | 6.4(1)x10 <sup>7</sup>                                 | 2.30(fixed)                              | 1.44(2)x10 <sup>7</sup>                                |
| 6.25                                       | 1.65x10 <sup>9</sup> (fixed)                           | 3.30x10 <sup>3</sup> (fixed)             | 4.9(2)x10 <sup>7</sup>                                 | 2.30(fixed)                              | 1.330(5)x10 <sup>7</sup>                               |
| Average <sup>c</sup>                       | 1.7(1)x10 <sup>9</sup>                                 | 3.3(2)x10 <sup>3</sup>                   | 5.5(8)x10 <sup>7</sup>                                 | 2.4(3)                                   | 1.4(3)x10 <sup>7</sup>                                 |

<sup>a</sup>The post-mixing concentrations were [SCN<sup>-</sup>] = 100  $\mu$ M, [LPO] = 0.5  $\mu$ M, [TNB] = 100  $\mu$ M, and [H<sub>2</sub>O<sub>2</sub>] = 6.25, 12.5, 25, and 50  $\mu$ M.

<sup>b</sup>The estimated error, given by the parenthetical digits, for the individual rate constants is for a least-squares fit.

<sup>c</sup>The average error was calculated by the standard deviation of the individual fits.

**Table S8.** Fitted rate constants for the proposed mechanism of the LPO-catalyzed oxidation of  $\text{SCN}^-$  by  $\text{H}_2\text{O}_2$  as  $[\text{LPO}]$  was varied.<sup>a</sup>

| $[\text{LPO}](\mu\text{M})$ | $k_1 (\text{M}^{-1}\cdot\text{s}^{-1})^b$ | $k_{-1} (\text{s}^{-1})^b$       | $k_2 (\text{M}^{-1}\cdot\text{s}^{-1})^b$ | $k_{-2} (\text{s}^{-1})^b$ | $k_3 (\text{M}^{-1}\cdot\text{s}^{-1})^b$ |
|-----------------------------|-------------------------------------------|----------------------------------|-------------------------------------------|----------------------------|-------------------------------------------|
| 0.125                       | $1.20 \times 10^9(\text{fixed})$          | $4.20 \times 10^3$               | $2.42 \times 10^7(\text{fixed})$          | 1.98(1)                    | $7.39(2) \times 10^6$                     |
| 0.25                        | $1.2(2) \times 10^9$                      | $4.2(4) \times 10^3$             | $2.5(2) \times 10^7$                      | 2.17(1)                    | $7.30(3) \times 10^6$                     |
| 0.5                         | $1.17(2) \times 10^9$                     | $4.2(7) \times 10^3$             | $2.5(4) \times 10^7$                      | 2.35(1)                    | $7.32(5) \times 10^6$                     |
| 1                           | $1.20 \times 10^9(\text{fixed})$          | $4.20 \times 10^3(\text{fixed})$ | $2.27(1) \times 10^7$                     | 2.39(1)                    | $7.56(2) \times 10^6$                     |
| 2                           | $1.20 \times 10^9(\text{fixed})$          | $4.20 \times 10^3(\text{fixed})$ | $1.79(1) \times 10^7$                     | 2.30(fixed)                | $7.19(2) \times 10^6$                     |
| Average <sup>c</sup>        | $1.20(4) \times 10^9$                     | $4.18(3) \times 10^3$            | $2.3(3) \times 10^7$                      | 2.2(2)                     | $7.4(1) \times 10^6$                      |

<sup>a</sup>The post-mixing concentrations were  $[\text{SCN}^-] = 200 \mu\text{M}$ ,  $[\text{H}_2\text{O}_2] = 40 \mu\text{M}$ ,  $[\text{TNB}] = 100 \mu\text{M}$ , and  $[\text{LPO}] = 0.125, 0.25, 0.5, 1, \text{ and } 2 \mu\text{M}$ .

<sup>b</sup>The estimated error, given by the parenthetical digits, for the individual rate constants is for a least-squares fit.

<sup>c</sup>The average error was calculated by the standard deviation of the individual fits.
